# Supplementary material for: Impact of FHIT loss on the translation of cancer-associated mRNAs
Source: Springer Nature journal article supplement (doi:10.1186/s12943-017-0749-x), 2017-12-01
Supplement: MOESM6 [file 15331854]

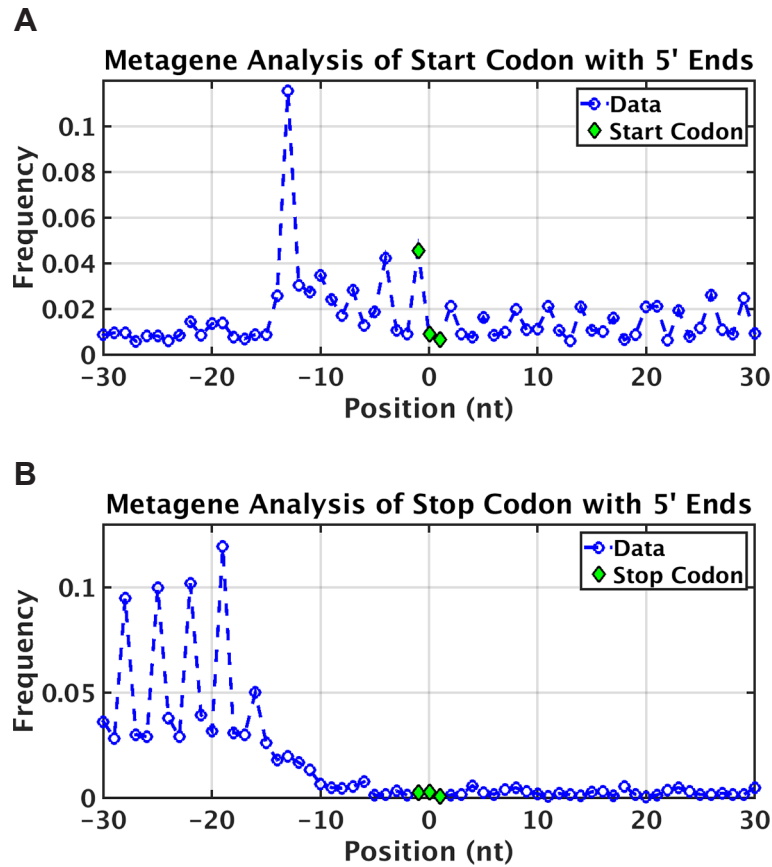

### Additional file 6

**Metagene analysis shows periodicity of bound ribosomes.** The 5' ends of reads of each of the ribosome protected fragments were mapped with respect to start (**A**) and stop (**B**) codons. This confirmed a 3 nucleotide periodicity consistent with the triplicate nature of codons and the peak 13 nucleotides upstream of start codons is consistent with ribosomes bound at these locations.
