# Supplementary material for: Impact of FHIT loss on the translation of cancer-associated mRNAs
Source: Mol Cancer. 2017 Dec 28;16:179. doi: 10.1186/s12943-017-0749-x (PMC5745650; doi:10.1186/s12943-017-0749-x)
Supplement: Supplementary file 2 — A list of oligonucleotides used. (XLSX 11 kb) [file 12943_2017_749_MOESM2_ESM.xlsx]

## Sheet: Sheet1
Additional file 2. List of oligonucleotides used
Experiment	Oligo name	Sequence
Ribosome profiling: rRNA fragment depletion oligos	rRNA_Dep1:	CGGGCCCGACGGCGCGACC/3Bio/
	rRNA_Dep2:	GGCGCCTCGTCCAGCCGCGGCGC/3Bio/
	rRNA_Dep3:	GGCCTCGGGATCCCACCTCGGCC/3Bio/
	rRNA_Dep4:	CCGGCGCGCCCCCGCGGGGG/3Bio/
	rRNA_Dep5:	GCGACGCTCAGACAGGCGTAGCCCC/3Bio/
Ribosome profiling: library prep oligos	RNA Linker	/5rApp/CTGTAGGCACCATCAAT/3ddC/
	RNA ladder_34	rArUrG rUrArC rArCrG rGrArG rUrCrG rArGrC rUrCrA rArCrC rCrGrC rArArC rGrCrG rA/3Phos/
	RNA ladder_26	rArUrG rUrArC rArCrG rGrArG rUrCrG rArCrC rCrArA rCrGrC rGrA/3Phos/
	RT primer	/5Phos/AGATCGGAAGAGCGTCGTGTAGGGAAAGAGTGTAGATCTCGGTGGTCGC/iSp18/CACTCA/iSp18/TTCAGACGTGTGCTCTTCCGATCTATTGATGGTGCCTACAG
Ribosome profiling: ribosomal cDNA depletion oligos	cDNA_Dep1:	/5BiotinTEG/ACCTCAGATCAGACGTGGCGACCCGCTGAAT
	cDNA_Dep2:	/5BiotinTEG/GGGCTACGCCTGTCTGAGCGTCGCTT
	cDNA_Dep3:	/5BiotinTEG/TGGGGGGGCCGGGCCACCCCTCCC
	cDNA_Dep4:	/5BiotinTEG/CGGGCGGGTCGCGCCG
	cDNA_Dep5:	/5BiotinTEG/AGCGGTGGATCACTCGGC
	cDNA_Dep6:	/5BiotinTEG/GCTTCTGGCGCCAAGCGCCCGG
	cDNA_Dep7:	/5BiotinTEG/GTCTAACACGTGCGCG
	cDNA_Dep8:	/5BiotinTEG/AAGGCTAAATACCGGCA
	cDNA_Dep9:	/5BiotinTEG/CCGGGGTCCGGTGCGGAGTGCC
	cDNA_Dep10:	/5BiotinTEG/CGCGCGGGAGGGCGCGTGCCCCGCCGCGCGC
	cDNA_Dep11:	/5BiotinTEG/GCCACGCAGTTTTATCCGGTAAAGCGAA
	cDNA_Dep12:	/5BiotinTEG/CCTCGGTTGGCCTCGGATAGCCGGTCCCCC
Ribosome profiling: Library amplification oligos	Library_Reverse	AATGATACGGCGACCACCGAGATCTACAC
	Barcode 1	CAAGCAGAAGACGGCATACGAGATcgtgatGTGACTGGAGTTCAGACGTGTGCTCTTCCG
	Barcode 2	CAAGCAGAAGACGGCATACGAGATctgatcGTGACTGGAGTTCAGACGTGTGCTCTTCCG
	Barcode 3	CAAGCAGAAGACGGCATACGAGATcggttaGTGACTGGAGTTCAGACGTGTGCTCTTCCG
	Barcode 4	CAAGCAGAAGACGGCATACGAGATatcgaaGTGACTGGAGTTCAGACGTGTGCTCTTCCG
RT-qPCR experiments	Luc_For	CTTATGCATGCGGCCGCATCTAGAGG
	Luc_Rev	CAGTTGCTCTCCAGCGGTTCCATCC
	VCL_For	AACCTCGTCCGGGTTGGAAAAGAGAC
	VCL_Rev	CACTGAGTAAGGGTCTGACTGAAGC
	GAPDH_pair	Hs.PT.39a.22214836
	eEF2_pair	Hs.PT.58.40025410
	TP53i3_pair	Hs.PT.58.27248188
	IFIT1_pair	Hs.PT.56a.20769090.g
